# Supplementary material
Source: PubMed Central journal article supplement (PMC7117915)
Supplement: AEM.02928-19-s0001.pdf [file AEM.02928-19-s0001.pdf]

**Analogous and diverse functions of APSES-type transcription factors in the morphogenesis of the entomopathogenic fungus, *Metarhizium rileyi***

Caiyan Xin<sup>a#</sup>, Jinping Zhang<sup>a#</sup>, Siji Nian<sup>a</sup>, Guangxi Wang<sup>a</sup>, Zhongkang Wang<sup>b</sup>, Zhangyong Song<sup>a\*</sup>, Guangwei Ren<sup>c</sup>

a School of Basic Medical Sciences, Southwest Medical University, Luzhou 646000, People's Republic of China.

b Chongqing Engineering Research Center for Fungal Insecticide, School of Life Science, Chongqing University, Chongqing 400030, People's Republic of China.

c Institute of Qingdao Economic Crop Chinese Academy of Agricultural Sciences, Qingdao 266101, People's Republic of China.

# These authors contributed equally to this work.

Author 1: Given name: Caiyan

Family name: Xin

Email: xincy0211@126.com

Author 2: Given name: Jinping

Family name: Zhang

Email: zhangjpwcx@163.com

Author 3: Given name: Siji

Family name: Nian

Email: sijinian@swmu.edu.cn

Author 4: Given name: Guangxi

Family name: Wang

Email: [2371966379@qq.com](mailto:2371966379@qq.com)

Author 5: Given name: Zhongkang

Family name: Wang

Email: [w-zk@163.com](mailto:w-zk@163.com)

Author 6: Given name: Zhangyong

Family name: Song

Email: [szy83529@163.com](mailto:szy83529@163.com)

Tel/Fax: +86-0830-3161506

Author 7: Given name: Guangwei

Family name: Ren

Email: [renguangwei@caas.cn](mailto:renguangwei@caas.cn)

## Supporting information

**Table S1** Gene expression in  $\Delta MrStuA$  mutants relative to wild-type (WT) during dimorphic transition.

**Table S2** Gene expression in  $\Delta MrXbp$  mutants relative to WT during dimorphic transition.

**Table S3** Gene expression in  $\Delta MrStuA$  mutants relative to WT during microsclerotium development.

**Table S4** Gene expression in  $\Delta MrXbp$  mutants relative to WT during microsclerotium development.

**Fig. S1** Structural and phylogenetic analysis of MrXbp and MrStuA proteins.

**Fig. S2** Confirmation of gene disruption.

**Fig. S3** Gene ontology (GO) annotation of differentially expressed genes (DEGs) and all genes in the (A)  $\Delta MrStuA$  and (B)  $\Delta MrXbp$  mutants during dimorphic transition.

**Fig. S4** Clusters of orthologous groups (COG) classifications in the (A)  $\Delta MrStuA$  and (B)  $\Delta MrXbp$  mutants during dimorphic transition.

**Fig. S5** Kyoto Encyclopedia of Genes and Genomes (KEGG) enrichment pathways of DEGs the (A)  $\Delta MrStuA$  and (B)  $\Delta MrXbp$  mutants during dimorphic transition.

**Fig. S6** GO annotation of DEGs and all genes the (A)  $\Delta MrStuA$  and (B)  $\Delta MrXbp$  mutants during microsclerotium development.

**Fig. S7** COG classifications the (A)  $\Delta MrStuA$  and (B)  $\Delta MrXbp$  mutants during microsclerotium development.

**Fig. S8** KEGG enrichment pathways of DEGs the (A)  $\Delta MrStuA$  and (B)  $\Delta MrXbp$

mutants during microsclerotium development.

**Fig. S9** RT-qPCR of WT,  $\Delta MrStuA$  and  $\Delta MrXbp$  mutants during (A) dimorphic transition and (B) microsclerotium development.

**Fig. S10** GO annotation of DEGs and all genes in the two morphogenesis in the (A)  $\Delta MrStuA$  and (B)  $\Delta MrXbp$  mutants.

**Fig. S11** COG classifications of consensus sequence in the two morphogenesis in the (A)  $\Delta MrStuA$  and (B)  $\Delta MrXbp$  mutants.

**Fig. S12** KEGG enrichment pathways of DEGs in the two morphogenesis in the (A)  $\Delta MrStuA$  and (B)  $\Delta MrXbp$  mutants.

**Fig. S13** Venn diagram showing the number of shared differentially expressed genes in the three fungal transcription factors.

**Table S1** Gene expression in  $\Delta MrStuA$  mutants relative to wild-type (WT) during dimorphic transition

| Annotation from NCBI Nr<br>protein database | Gene<br>Name | GW1_FPKM | GW2_FPKM | GW3_FPKM | GS1_FPKM | GS2_FPKM | GS3_FPKM | log2FC  | Up/Down | FDR      |
|---------------------------------------------|--------------|----------|----------|----------|----------|----------|----------|---------|---------|----------|
| Cellulase                                   | <i>Cel</i>   | 7.641    | 5.207    | 5.092    | 1.429    | 0.991    | 0.967    | -2.213  | Down    | 6.32E-05 |
| Cytochrome P450                             | <i>Cp450</i> | 0.609    | 0.346    | 0.162    | 2.113    | 1.627    | 1.288    | 2.357   | Up      | 1.80E-6  |
| Heat shock protein 101                      | <i>H101</i>  | 90.944   | 107.584  | 84.997   | 882.414  | 713.167  | 717.310  | 3.214   | Up      | 9.46E-45 |
| GATA transcription factor                   | <i>NsdD</i>  | 4.169    | 4.167    | 3.989    | 9.684    | 9.626    | 8.946    | 1.450   | Up      | 1.94E-08 |
| Heat shock protein 90                       | <i>H90</i>   | 554.026  | 352.991  | 567.606  | 1395.486 | 1391.291 | 1242.497 | 1.634   | Up      | 2.08E-24 |
| Cell wall beta-glucan<br>synthesis          | <i>Cwb</i>   | 1340.449 | 1271.608 | 1278.913 | 1121.157 | 1099.003 | 1045.579 | -0.0677 | Normal  | 0.8755   |
| Protein-tyrosine<br>phosphatase             | <i>Ptp</i>   | 65.210   | 66.009   | 70.078   | 43.187   | 44.949   | 41.099   | -0.454  | Normal  | 0.120    |
| bZIP transcription factor<br>HapX           | <i>HapX</i>  | 106.516  | 100.291  | 97.252   | 43.285   | 37.952   | 41.278   | -1.125  | Down    | 5.01E-10 |
| MAP kinase kinase EMK1                      | <i>Emk1</i>  | 114.815  | 107.860  | 100.243  | 129.258  | 112.718  | 119.672  | 0.3439  | Normal  | 0.181    |
| Cytochrome c peroxidase                     | <i>Ccp</i>   | 94.366   | 99.565   | 99.157   | 58.498   | 88.807   | 61.365   | 0.6509  | Normal  | 0.00093  |
| ATPase assembly factor<br>ATP10             | <i>Atp10</i> | 89.720   | 83.323   | 80.491   | 60.525   | 63.557   | 62.765   | -0.255  | Normal  | 0.391    |
| Mob1/phocein                                | <i>Mob</i>   | 23.610   | 17.309   | 22.918   | 25.562   | 16.770   | 18.760   | 0.6037  | Normal  | 0.2491   |

|                         |             |        |        |        |        |        |        |        |        |       |
|-------------------------|-------------|--------|--------|--------|--------|--------|--------|--------|--------|-------|
| DNA-repair protein rad2 | <i>Rad2</i> | 6.245  | 10.622 | 9.246  | 8.141  | 9.635  | 9.040  | 0.596  | Normal | 0.221 |
| ChaC-like protein       | <i>Clp</i>  | 56.621 | 45.068 | 56.537 | 52.606 | 51.923 | 22.517 | 0.8753 | Normal | 0.131 |

Abbreviation used: RPKM: fragments per kilobase million; FDR: false discovery rate; FC: fold change; Up/Down: up-/down-regulated. GW1, GW2, and GW3 were three samples of the WT strain during dimorphic transition. GS1, GS2, and GS3 were three samples of the  $\Delta MrStuA$  mutants during dimorphic transition.

**Table S2** Gene expression in  $\Delta MrXbp$  mutants relative to WT during dimorphic transition

| Annotation from NCBI Nr<br>protein database | Gene<br>Name | GW1_FPKM | GW2_FPKM | GW3_FPKM | GX1_FPKM | GX2_FPKM | GX3_FPKM | log2FC    | Up/Down | FDR      |
|---------------------------------------------|--------------|----------|----------|----------|----------|----------|----------|-----------|---------|----------|
| Cytochrome P450                             | <i>Cp450</i> | 0.609    | 0.346    | 0.162    | 0.169    | 0.280    | 0.161    | -0.824    | Normal  | 0.371    |
| GATA transcription factor                   | <i>NsdD</i>  | 4.169    | 4.167    | 3.989    | 10.440   | 12.405   | 10.568   | 1.561     | Up      | 7.58E-11 |
| Cellulase                                   | <i>Cel</i>   | 7.641    | 5.207    | 5.092    | 0        | 0        | 0        | $-\infty$ | Down    | 7.12E-31 |
| Heat shock protein 101                      | <i>H101</i>  | 90.944   | 107.584  | 84.997   | 219.451  | 335.662  | 256.553  | 1.554     | Up      | 3.02E-06 |
| Heat shock protein 90                       | <i>H90</i>   | 554.026  | 352.991  | 567.606  | 1395.564 | 962.506  | 1596.451 | 1.452     | Up      | 2.36E-05 |
| Cell wall beta-glucan<br>syntheses          | <i>Cwb</i>   | 1340.449 | 1271.608 | 1278.913 | 3061.632 | 2841.773 | 2976.183 | 1.222     | Up      | 2.99E-20 |
| Protein-tyrosine<br>phosphatase             | <i>Ptp</i>   | 65.210   | 66.009   | 70.078   | 13.032   | 13.125   | 11.998   | -2.366    | Down    | 1.32E-20 |
| MAP kinase kinase EMK1                      | <i>Emk1</i>  | 114.815  | 107.860  | 100.243  | 3061.631 | 2841.772 | 2976.182 | 1.222     | Up      | 2.98E-20 |
| Cytochrome c peroxidase                     | <i>Ccp</i>   | 94.366   | 99.565   | 99.157   | 297.820  | 292.440  | 299.596  | 2.050     | Up      | 1.31E-34 |
| ATPase assembly factor<br>ATP10             | <i>Atp10</i> | 89.720   | 83.323   | 80.491   | 85.463   | 83.348   | 78.939   | -0.000419 | Normal  | 0.997    |
| Mob1/phocein                                | <i>Mob</i>   | 23.610   | 17.309   | 22.918   | 14.267   | 15.234   | 14.845   | -0.372    | Normal  | 0.1642   |
| DNA-repair protein rad2                     | <i>Rad2</i>  | 6.245    | 10.622   | 9.246    | 15.466   | 16.311   | 15.420   | 0.00005   | Normal  | 0.833    |
| ChaC-like protein                           | <i>Clp</i>   | 56.621   | 45.068   | 56.537   | 48.013   | 24.020   | 46.171   | -0.3970   | Normal  | 0.238    |

---

|                                       |         |         |        |        |        |        |        |      |          |
|---------------------------------------|---------|---------|--------|--------|--------|--------|--------|------|----------|
| bZIP transcription factor <i>HapX</i> | 106.516 | 100.291 | 97.252 | 28.235 | 25.508 | 23.601 | -1.942 | Down | 1.64E-28 |
|---------------------------------------|---------|---------|--------|--------|--------|--------|--------|------|----------|

---

Abbreviation used: RPKM: fragments per kilobase million; FDR: false discovery rate; FC: fold change; Up/Down: up-/down-regulated. GW1, GW2, and GW3 were three samples of the WT strain during dimorphic transition. GX1, GX2, and GX3 were three samples of the  $\Delta MrXbp$  mutants during dimorphic transition.



**Table S3** Gene expression in  $\Delta MrStuA$  mutants relative to WT during microsclerotium development

| Annotation from NCBI Nr<br>protein database | Gene Name    | W1_FPKM | W2_FPKM  | W3_FPKM<br>M | N1_FPKM  | N2_FPKM  | N3_FPKM  | log2FC | Up/Down | FDR      |
|---------------------------------------------|--------------|---------|----------|--------------|----------|----------|----------|--------|---------|----------|
| Heat shock protein 101                      | <i>H101</i>  | 298.837 | 123.399  | 390.334      | 3331.313 | 29995.36 | 1220.111 | 2.737  | Up      | 0.00562  |
| Ubiquitin-conjugating<br>enzyme             | <i>Uce</i>   | 16.518  | 12.835   | 15.171       | 0.741    | 0.399    | 0.553    | -5.098 | Down    | 2.00E-10 |
| Heat shock protein 90                       | <i>H90</i>   | 841.821 | 1072.921 | 982.204      | 3700.62  | 4038.17  | 3571.412 | 1.342  | Up      | 0.0307   |
| Mob1/phocein                                | <i>Mob</i>   | 268.787 | 282.770  | 252.793      | 88.544   | 75.437   | 92.271   | -2.099 | Down    | 0.000104 |
| ChaC-like protein                           | <i>Clp</i>   | 23.874  | 44.283   | 46.679       | 14.739   | 13.585   | 15.763   | -1.709 | Down    | 0.000405 |
| MAP kinase kinase EMK1                      | <i>Emk1</i>  | 39.946  | 50.166   | 55.233       | 29.705   | 21.825   | 30.360   | -1.227 | Down    | 0.002    |
| Cell surface protein (Mas1)                 | <i>Mas1</i>  | 1.649   | 1.525    | 1.871        | 20.657   | 25.723   | 39.557   | 3.626  | Up      | 1.13E-06 |
| Sodium/calcium exchanger<br>membrane region | <i>Sem</i>   | 9.694   | 10.275   | 11.437       | 7.801    | 10.792   | 11.529   | -0.361 | Normal  | 0.629    |
| DNA-repair protein rad2                     | <i>Rad2</i>  | 8.583   | 3.697    | 2.232        | 29.018   | 24.406   | 37.987   | 2.30   | Up      | 2.31E-10 |
| Cytochrome c peroxidase                     | <i>Ccp</i>   | 193.788 | 133.213  | 165.189      | 145.535  | 93.391   | 89.990   | -1.513 | Down    | 0.00187  |
| Membrane protein Tapt1                      | <i>Tapt1</i> | 12.885  | 15.915   | 11.571       | 12.765   | 14.495   | 12.518   | 0.619  | Normal  | 0.3194   |
| GATA transcription factor                   | <i>NsdD</i>  | 13.459  | 7.622    | 9.299        | 16.071   | 11.646   | 9.490    | 0.312  | Normal  | 0.650    |

---

|                              |              |        |         |         |        |        |        |        |      |          |
|------------------------------|--------------|--------|---------|---------|--------|--------|--------|--------|------|----------|
| Carbohydrate-binding Wsc     | <i>Wsc</i>   | 25.114 | 23.851  | 20.4269 | 23.877 | 74.704 | 52.111 | 1.243  | Up   | 0.00227  |
| ATPase assembly factor ATP10 | <i>Atp10</i> | 81.890 | 135.420 | 81.929  | 54.530 | 40.112 | 45.331 | -1.509 | Down | 0.000406 |

---

Abbreviation used: RPKM: fragments per kilobase million; FDR: false discovery rate; FC: fold change; Up/Down: up-/down-regulated. W1, W2, and W3 were three samples of the WT strain during microsclerotium development. S1, S2, and S3 were three samples of the  $\Delta MrStuA$  mutants during microsclerotium development.

**Table S4** Gene expression in  $\Delta MrXbp$  mutants relative to WT during microsclerotium development

| Annotation from NCBI Nr protein database | Gene Name    | W1_FPKM | W2_FPKM  | W3_FPKM | N1_FPKM | N2_FPKM | N3_FPKM  | log2FC  | Up/Down | FDR      |
|------------------------------------------|--------------|---------|----------|---------|---------|---------|----------|---------|---------|----------|
| Heat shock protein 101                   | <i>H101</i>  | 274.482 | 113.266  | 355.170 | 537.836 | 575.774 | 318.860  | 0.752   | Normal  | 0.314    |
| Ubiquitin-conjugating enzyme             | <i>Uce</i>   | 16.518  | 12.835   | 15.171  | 0.741   | 0.399   | 0.553    | -3.288  | Down    | 0.00616  |
| Heat shock protein 90                    | <i>H90</i>   | 841.821 | 1072.921 | 982.204 | 975.138 | 915.535 | 3571.412 | -0.209  | Normal  | 0.766    |
| Cytochrome c peroxidase                  | <i>Ccp</i>   | 158.170 | 109.121  | 132.960 | 302.973 | 255.471 | 282.015  | 0.324   | Normal  | 0.548    |
| Sodium/calcium exchanger membrane region | <i>Sem</i>   | 9.694   | 10.275   | 11.437  | 44.978  | 55.074  | 51.212   | 2.068   | Up      | 3.46E-11 |
| DNA-repair protein rad2                  | <i>Rad2</i>  | 8.583   | 3.697    | 2.232   | 30.8019 | 30.950  | 30.974   | 2.486   | Up      | 2.07E-14 |
| Carbohydrate-binding Wsc                 | <i>Wsc</i>   | 25.114  | 18.687   | 23.168  | 61.716  | 67.843  | 61.721   | 1.541   | Up      | 2.12E-06 |
| Mob1/phocein                             | <i>Mob</i>   | 268.787 | 282.770  | 252.793 | 99.832  | 89.361  | 93.163   | -1.693  | Down    | 0.000143 |
| ATPase assembly factor ATP10             | <i>Atp10</i> | 81.779  | 135.227  | 81.833  | 50.840  | 50.797  | 51.808   | -1.1207 | Down    | 0.00164  |
| ChaC-like protein                        | <i>Clp</i>   | 23.791  | 44.159   | 46.555  | 12.551  | 9.961   | 10.557   | -1.855  | Down    | 0.00005  |
| MAP kinase kinase EMK1                   | <i>Emk1</i>  | 39.892  | 50.094   | 55.162  | 56.886  | 49.716  | 44.039   | -0.1085 | Normal  | 0.7758   |
| Cell surface protein (Mas1)              | <i>Mas1</i>  | 1.649   | 1.525    | 3.355   | 4.483   | 3.519   | 39.557   | 0.9753  | Normal  | 0.3424   |
| GATA transcription factor                | <i>NsdD</i>  | 13.459  | 7.622    | 9.299   | 16.172  | 8.558   | 10.645   | 0.5103  | Normal  | 0.3257   |

---

|                        |              |        |        |        |       |       |       |        |      |         |
|------------------------|--------------|--------|--------|--------|-------|-------|-------|--------|------|---------|
| Membrane protein Tapt1 | <i>Tapt1</i> | 12.067 | 15.719 | 11.571 | 5.147 | 6.397 | 5.439 | -1.249 | Down | 0.00303 |
|------------------------|--------------|--------|--------|--------|-------|-------|-------|--------|------|---------|

---

Abbreviation used: RPKM: fragments per kilobase million; FDR: false discovery rate; FC: fold change; Up/Down: up-/down-regulated. W1, W2, and W3 were three samples of the WT strain during microsclerotium development. X1, X2, and X3 were three samples of the  $\Delta MrXbp$  mutant during microsclerotium development.

**Fig. S1** Structural and phylogenetic analysis of MrStuA and MrXbp proteins

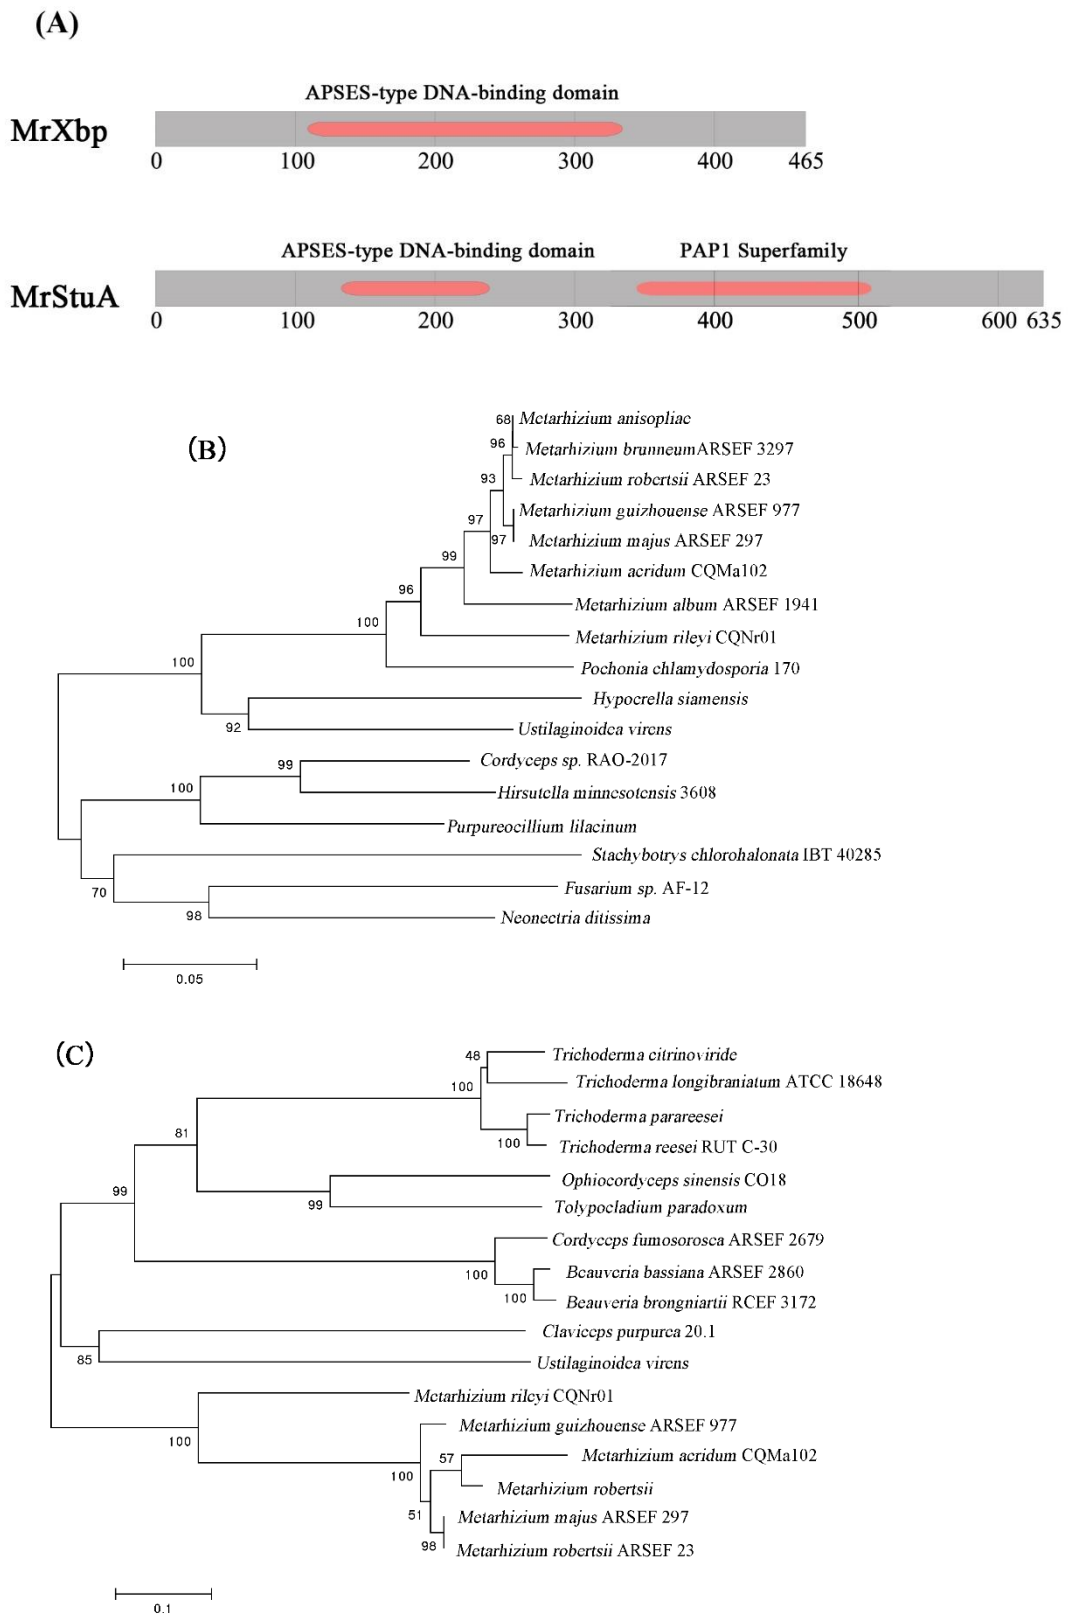

**(A)** Conserved domains predicted via sequence alignment

(<http://www.ebi.ac.uk/Tools/pfa/iprscan>). (B) Phylogenetic analysis of MrStuA protein. The numbers at the nodes represent the results of bootstrap analyses (1000 replicates) carried out using the neighbor-joining method. The aligned sequences of StuA protein are from *Metarhizium anisopliae* (KFG88133.1); *Metarhizium guizhouense* ARSEF 977 (KID87765.1); *Metarhizium majus* ARSEF 297 (KID98874.1); *Metarhizium brunneum* ARSEF 3297 (XP\_014545496.1); *Metarhizium album* ARSEF 1941 (KHN97002.1); *Metarhizium robertsii* ARSEF 23 (XP\_007819177.1); *Pochonia chlamydosporia* 170 (XP\_018139603.1); *Metarhizium acridum* CQMa 102 (XP\_007810169.1); *Ustilagoidea virens* (KDB12946.1); *Hypocrella siamensis* (ANH22586.1); *Fusarium* sp. AF-12 (RMJ13252.1); *Cordyceps* sp. RAO-2017 (PHH78192.1); *Purpureocillium lilacinum* (PWI75332.1); *Hirsutella minnesotensis* 3608 (KJZ71075.1); *Stachybotrys chlorohalonata* IBT 40285 (KFA66336.1); *Neonectria ditissima* (KPM35181.1). (C) Phylogenetic analysis of MrXbp protein. The numbers at the nodes represent the results of bootstrap analyses (1000 replicates) carried out using the neighbor-joining method. The aligned sequences of MrXbp protein are from *Metarhizium majus* ARSEF 297 (KID96819.1); *Metarhizium robertsii* ARSEF 23 (XP\_007821239.2); *Metarhizium guizhouense* ARSEF 977 (KID92324.1); *Metarhizium robertsii* (EXV05007.1); *Metarhizium acridum* CQMa 102 (XP\_007812764.1); *Tolypocladium paradoxum* (POR39629.1); *Cordyceps fumosorosea* ARSEF 2679 (XP\_018703649.1); *Beauveria bassiana* ARSEF 2860 (XP\_008593781.1); *Ustilagoidea virens* (KDB17052.1); *Trichoderma parareesei* (OTA01006.1); *Trichoderma citrinoviride* (XP\_024754116.1);

*Trichoderma longibrachiatum* ATCC 18648 (PTB80558.1); *Beauveria brongniartii*  
RCEF 3172 (OAA45796.1); *Trichoderma reesei* RUT C-30 (ETS05362.1);  
*Ophiocordyceps sinensis* CO18 (EQL01683.1); *Claviceps purpurea* 20.1  
(CCE33631.1).

**Fig. S2** Confirmation of gene disruption

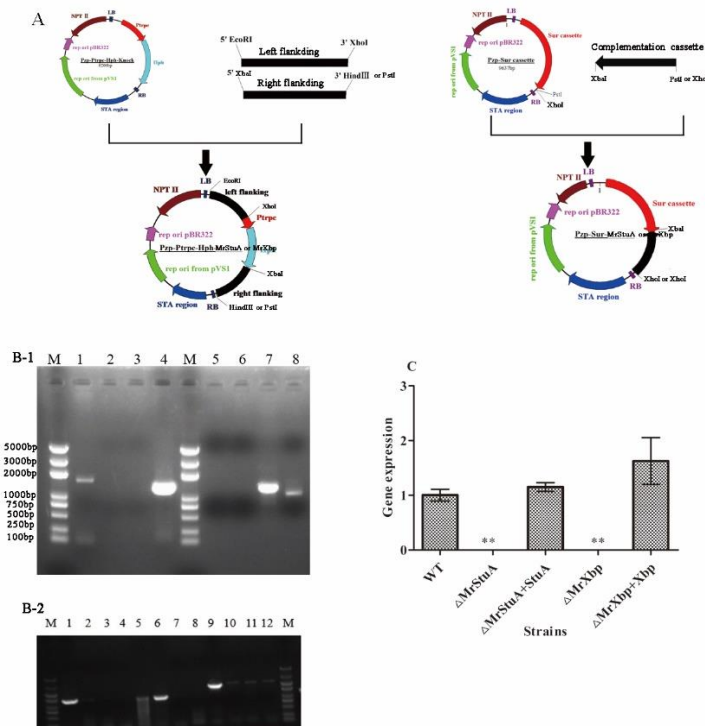

(A) Construction of knockout and complementation (CP) vectors. (B) PCR characterization of (B-1)  $\Delta MrStuA$  mutants and (B-2)  $\Delta MrXbp$  mutants, wild-type (WT), and CP strains. Open reading frame was PCR (Lanes 1-2 in B-1: 1-*MrStuA* of WT, 2- $\Delta MrStuA-1$ ; Lanes 1-3 in B-2: 1-*MrXbp* of WT, 2- $\Delta MrXbp-1$ , 3- $\Delta MrXbp-2$ ); The *hph* was screened (Lanes 3-4 in B-1: 3-*hph* of WT, 4- $\Delta MrStuA-1$ ; Lanes 4-6 in B-2: 4-*hph* of WT, 5- $\Delta MrXbp-1$ , 6- $\Delta MrXbp-2$ ). The *hph* and genomic sequence outside the flank regions was PCR (Lanes 5-8 in B-1: 5-Left Frame (LF)-WT, 6-Right Frame (RF)-WT, 7-LF- $\Delta MrStuA-1$ , 8-RF- $\Delta MrStuA-1$ ; Lanes 7-12 in B-2: 7-LF-WT, 8-RF-WT, 9-LF- $\Delta MrXbp-1$ , 10-RF- $\Delta MrXbp-1$ , 11-LF- $\Delta MrXbp-2$ , 12-RF- $\Delta MrXbp-2$ ). M, DNA molecular size markers (DL 5000, Takara, Beijing). The  $\Delta MrStuA-1$  mutants and  $\Delta MrXbp-1$  mutants were subjected to further



experiments. (C) qPCR analysis of *MrMid2* in the different strains. Error bars represent standard error. \*  $P < 0.05$ , \*\*  $P < 0.01$ , denote significant differences compared with WT in AM cultures.

**Fig. S3** Gene ontology (GO) annotation of differentially expressed genes (DEGs) and all genes in the (A)  $\Delta MrStuA$  and (B)  $\Delta MrXbp$  mutants during dimorphic transition

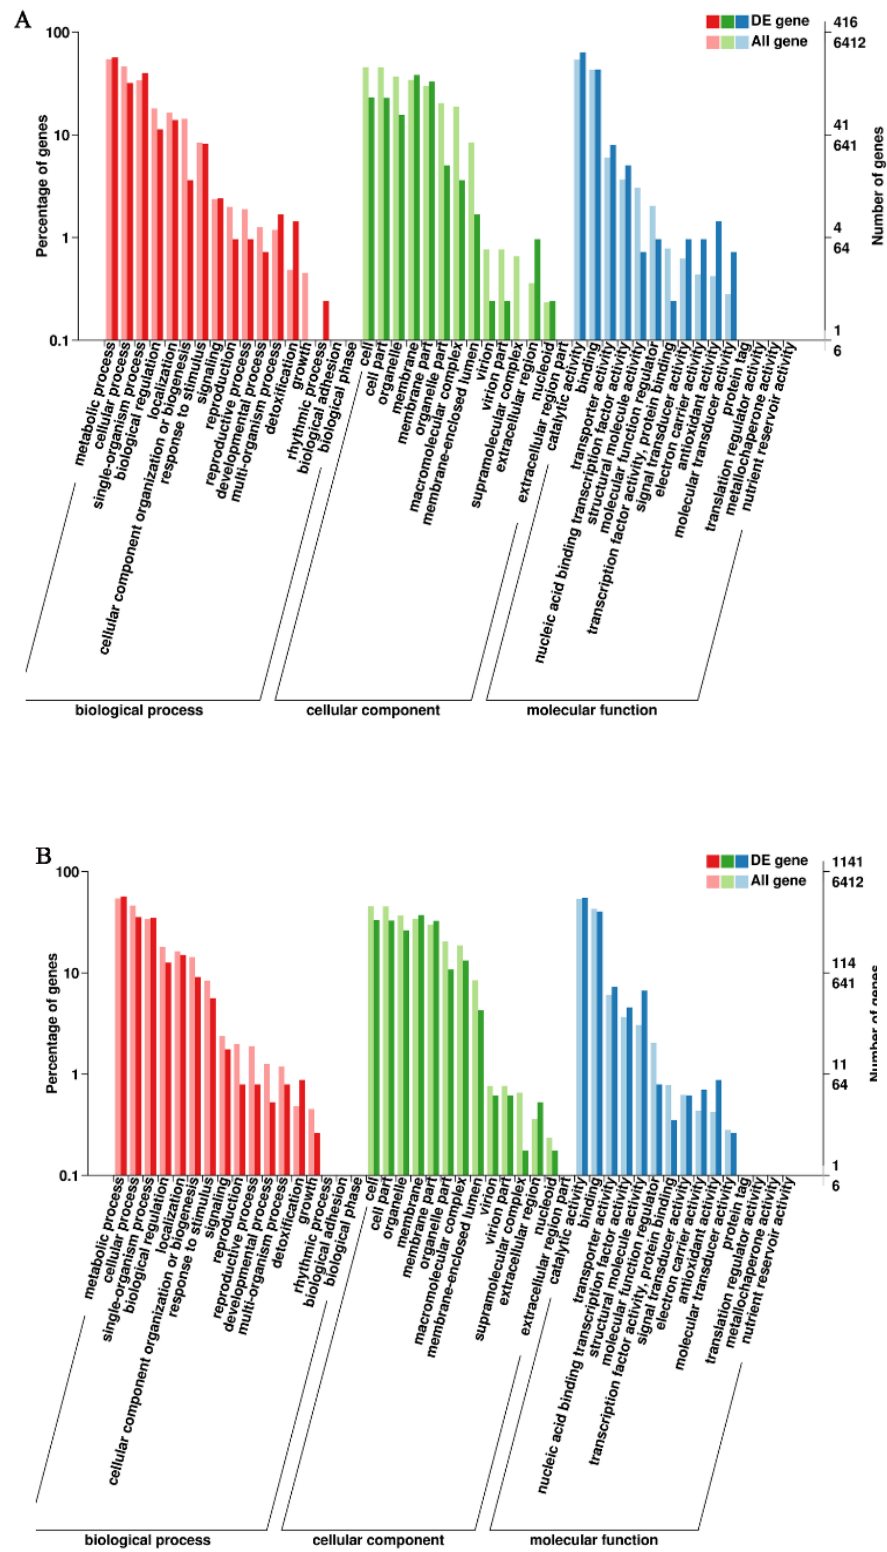

**Fig. S4** Clusters of orthologous groups (COG) classifications in the (A)  $\Delta MrStuA$  and (B)  $\Delta MrXbp$  mutants during dimorphic transition

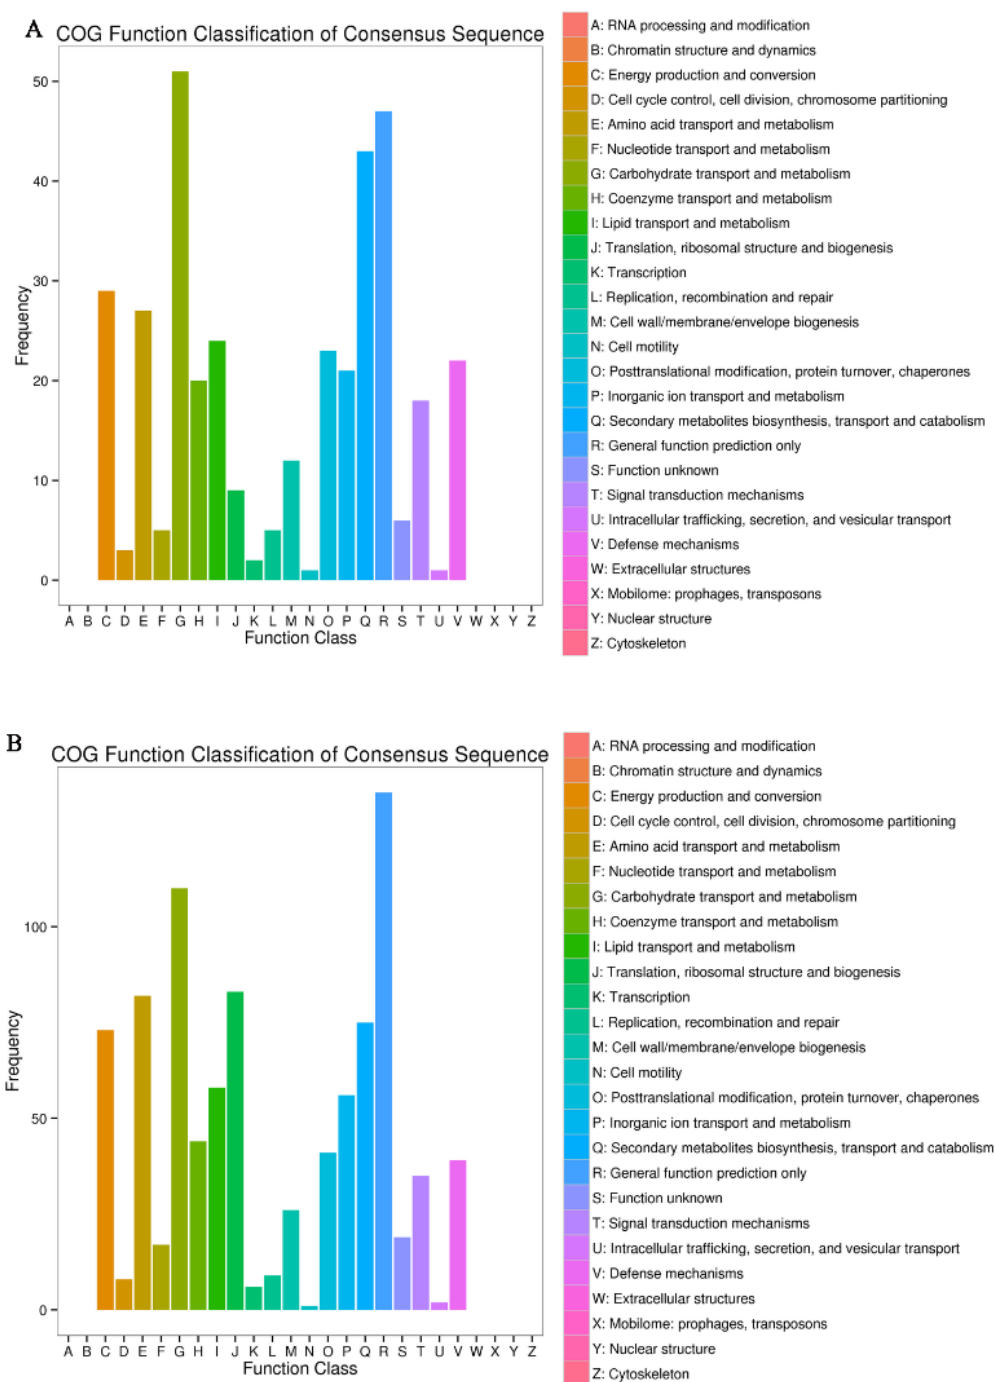

**Fig. S5** Kyoto Encyclopedia of Genes and Genomes (KEGG) enrichment pathways of DEGs in the (A)  $\Delta MrStuA$  and (B)  $\Delta MrXbp$  mutants during dimorphic transition

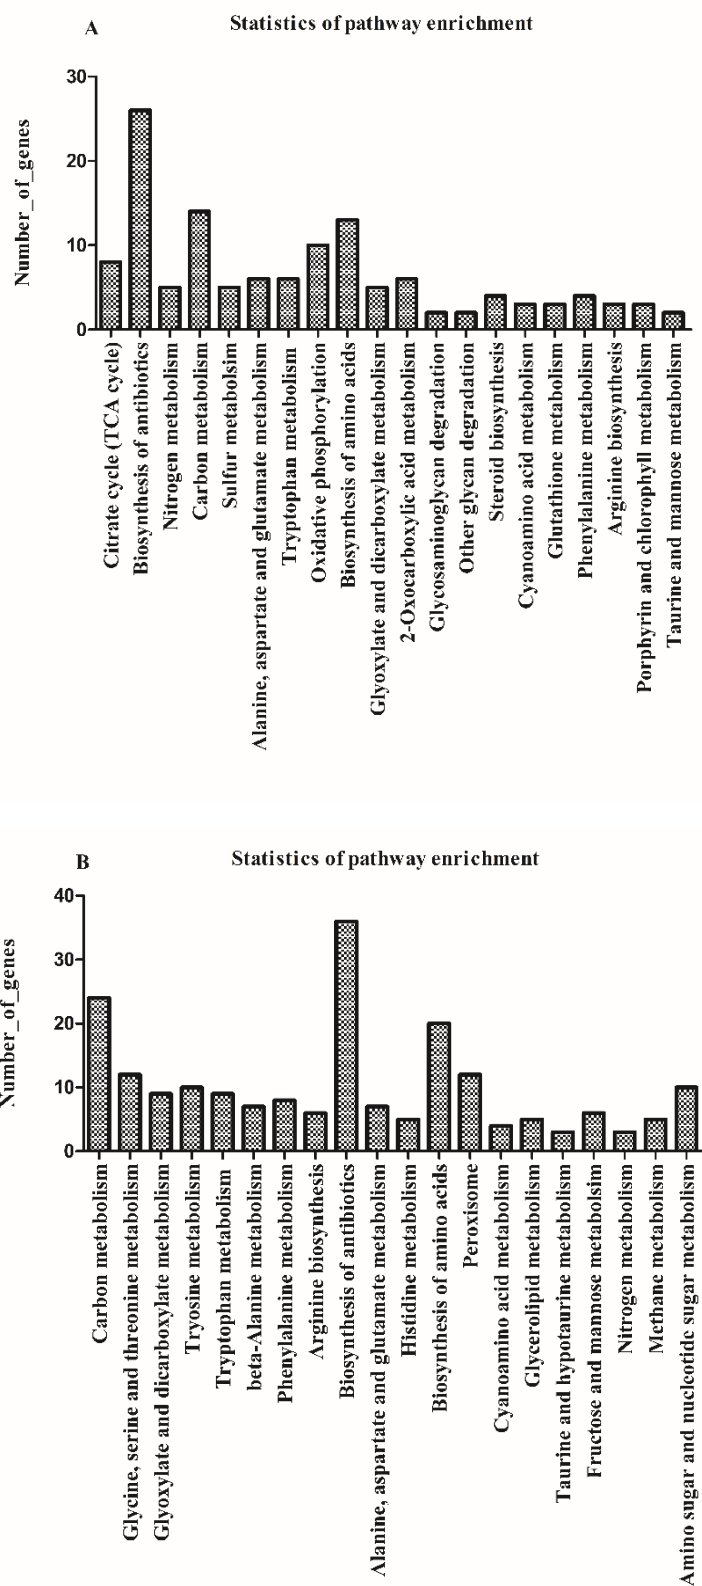

**Fig. S6** GO annotation of DEGs and all genes in the (A)  $\Delta MrStuA$  and (B)  $\Delta MrXbp$  mutants during microsclerotium development

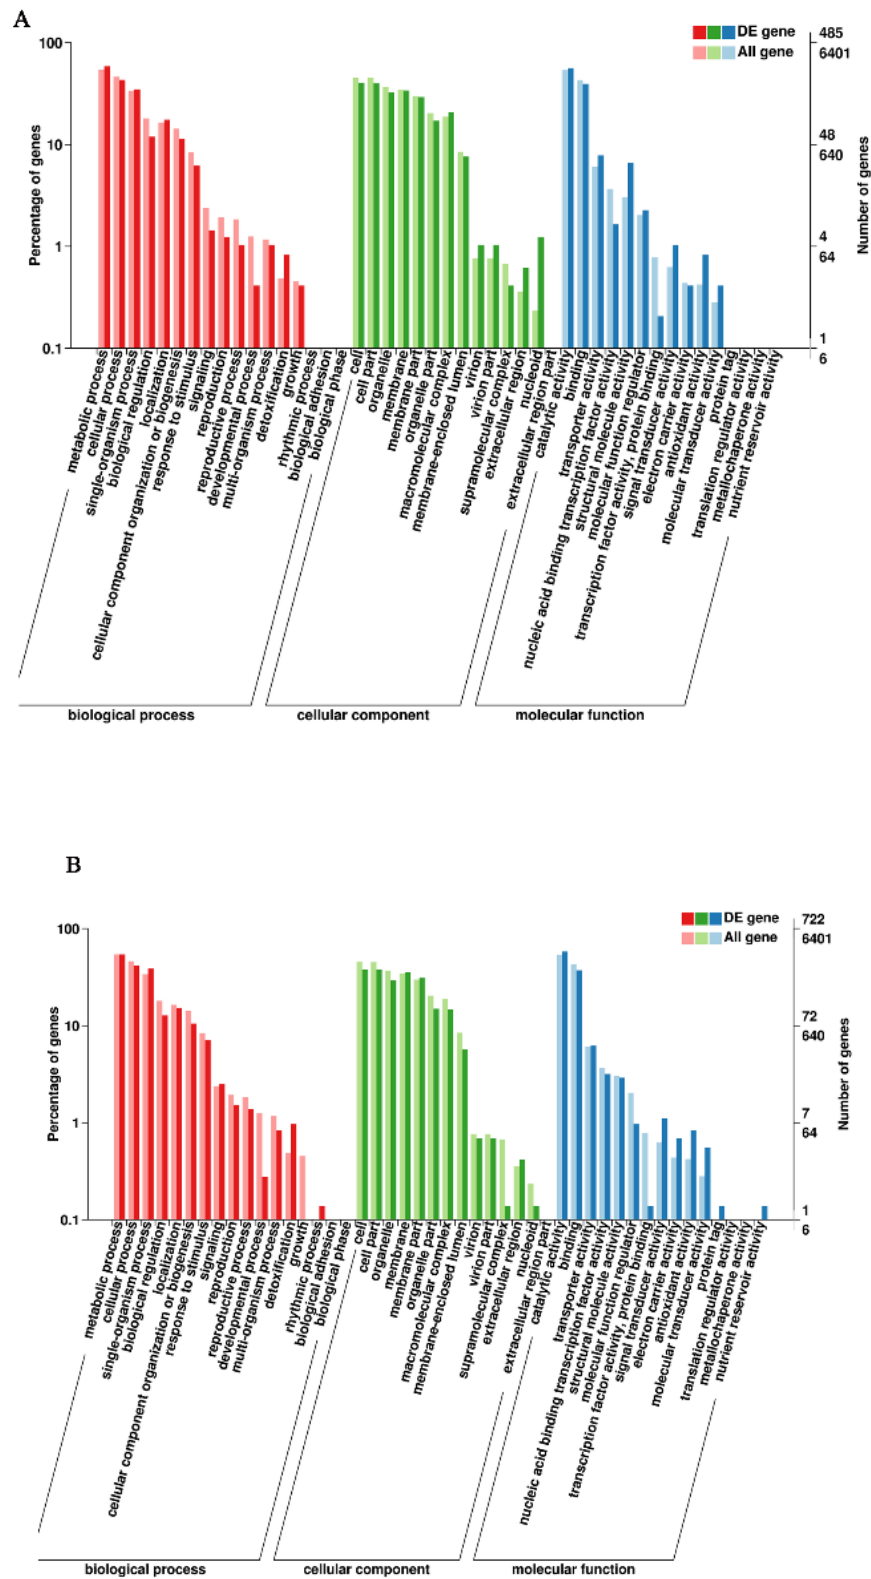

**Fig. S7** COG classifications in the (A)  $\Delta MrStuA$  and (B)  $\Delta MrXbp$  mutants during microsclerotium development

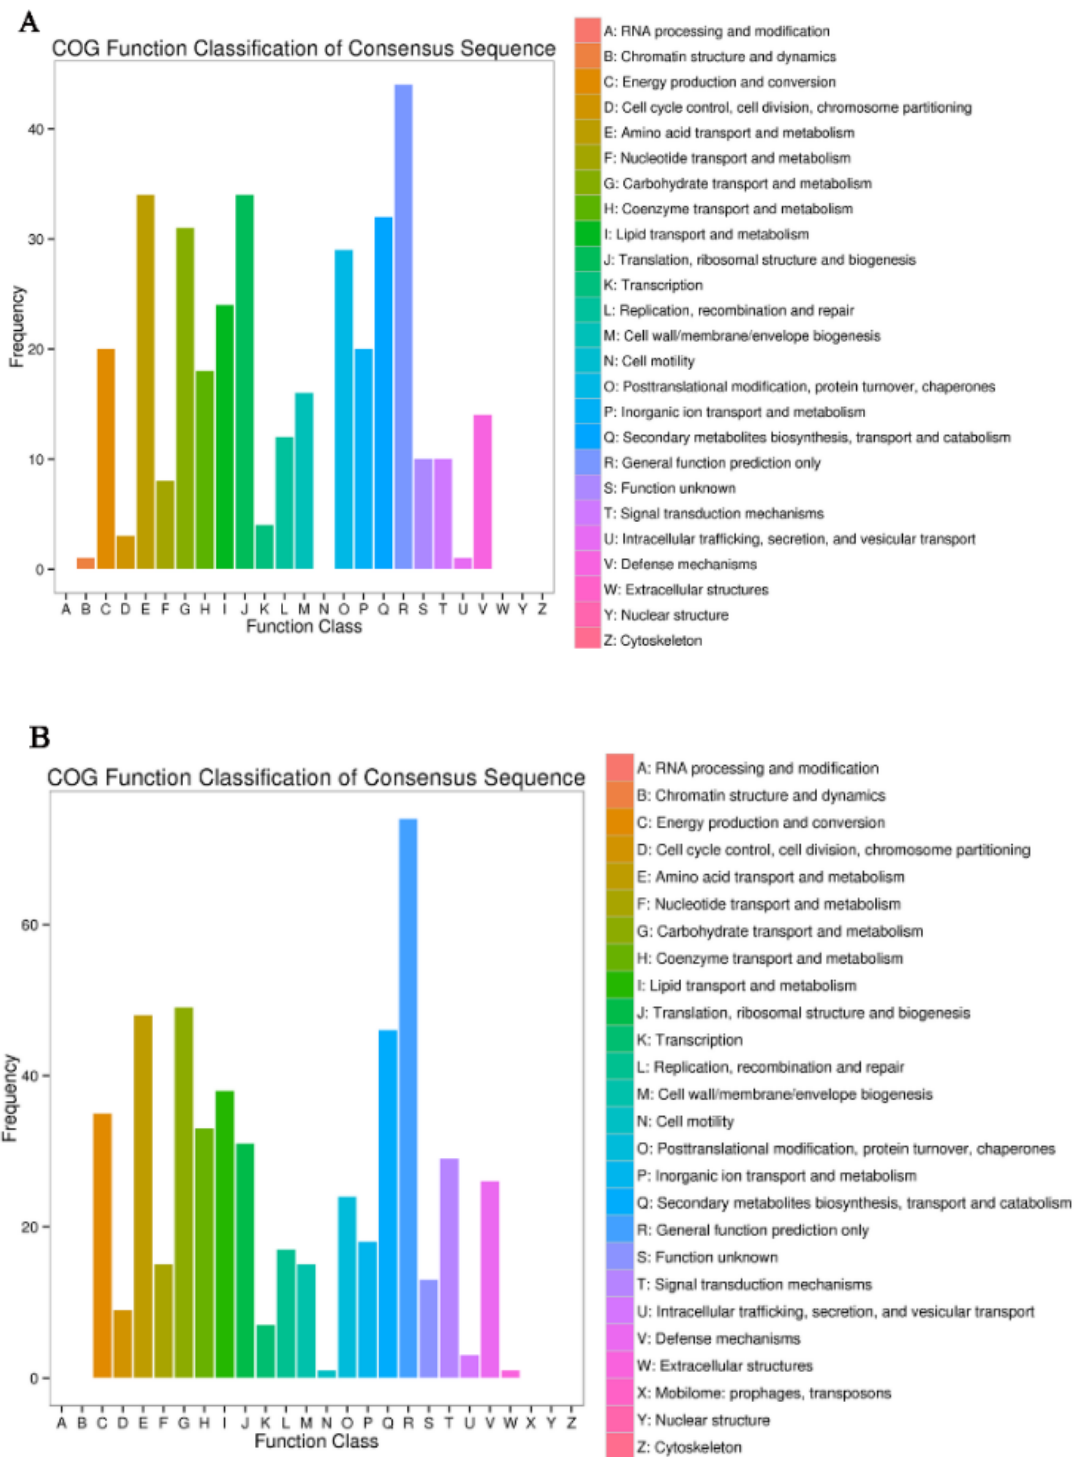

**Fig. S8** KEGG enrichment pathways of DEGs in the (A)  $\Delta MrStuA$  and (B)  $\Delta MrXbp$  mutants during microsclerotium development

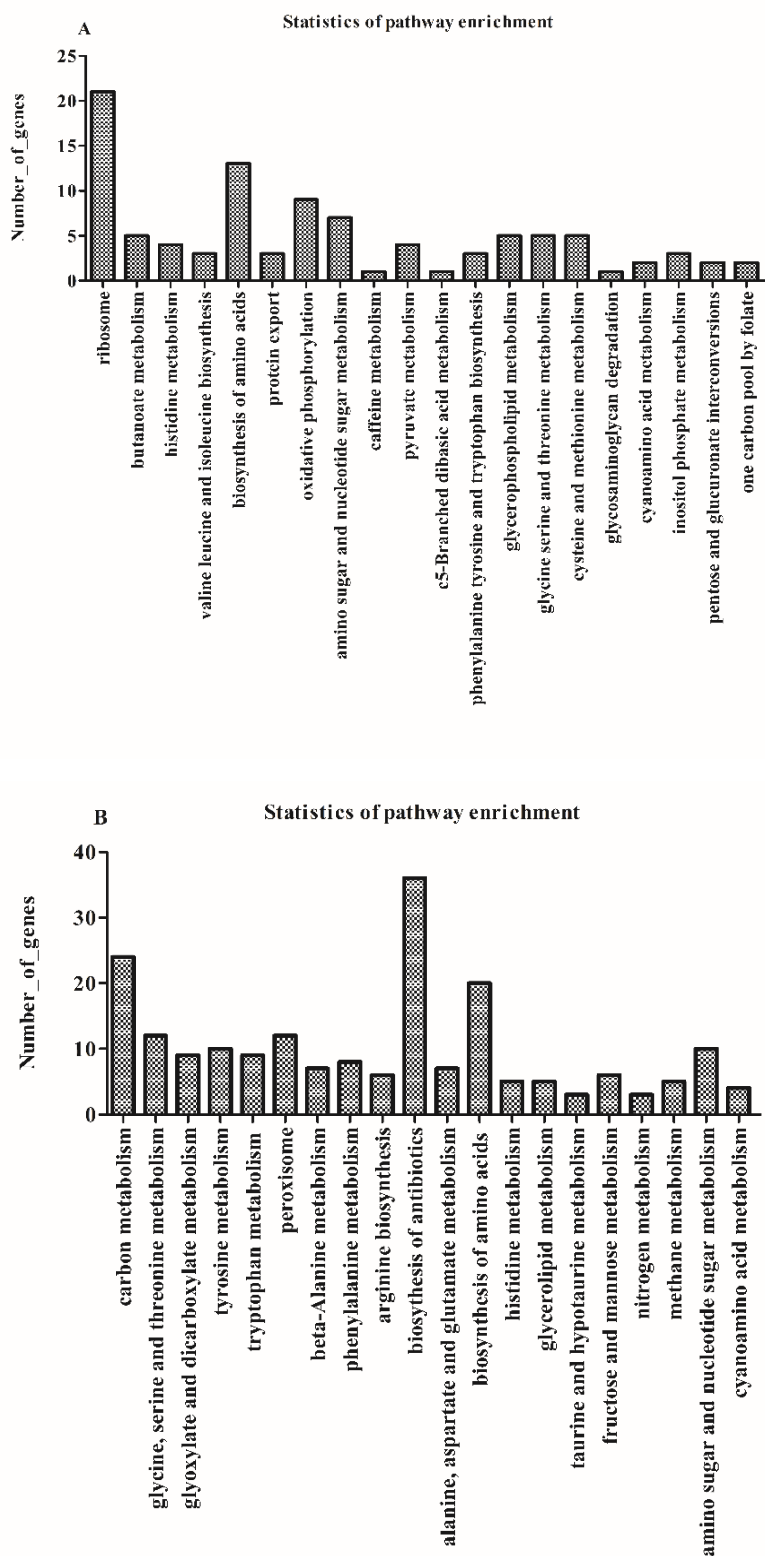

**Fig. S9** RT-qPCR of WT,  $\Delta MrStuA$  and  $\Delta MrXbp$  mutants during (A) dimorphic transition and (B) microsclerotium development

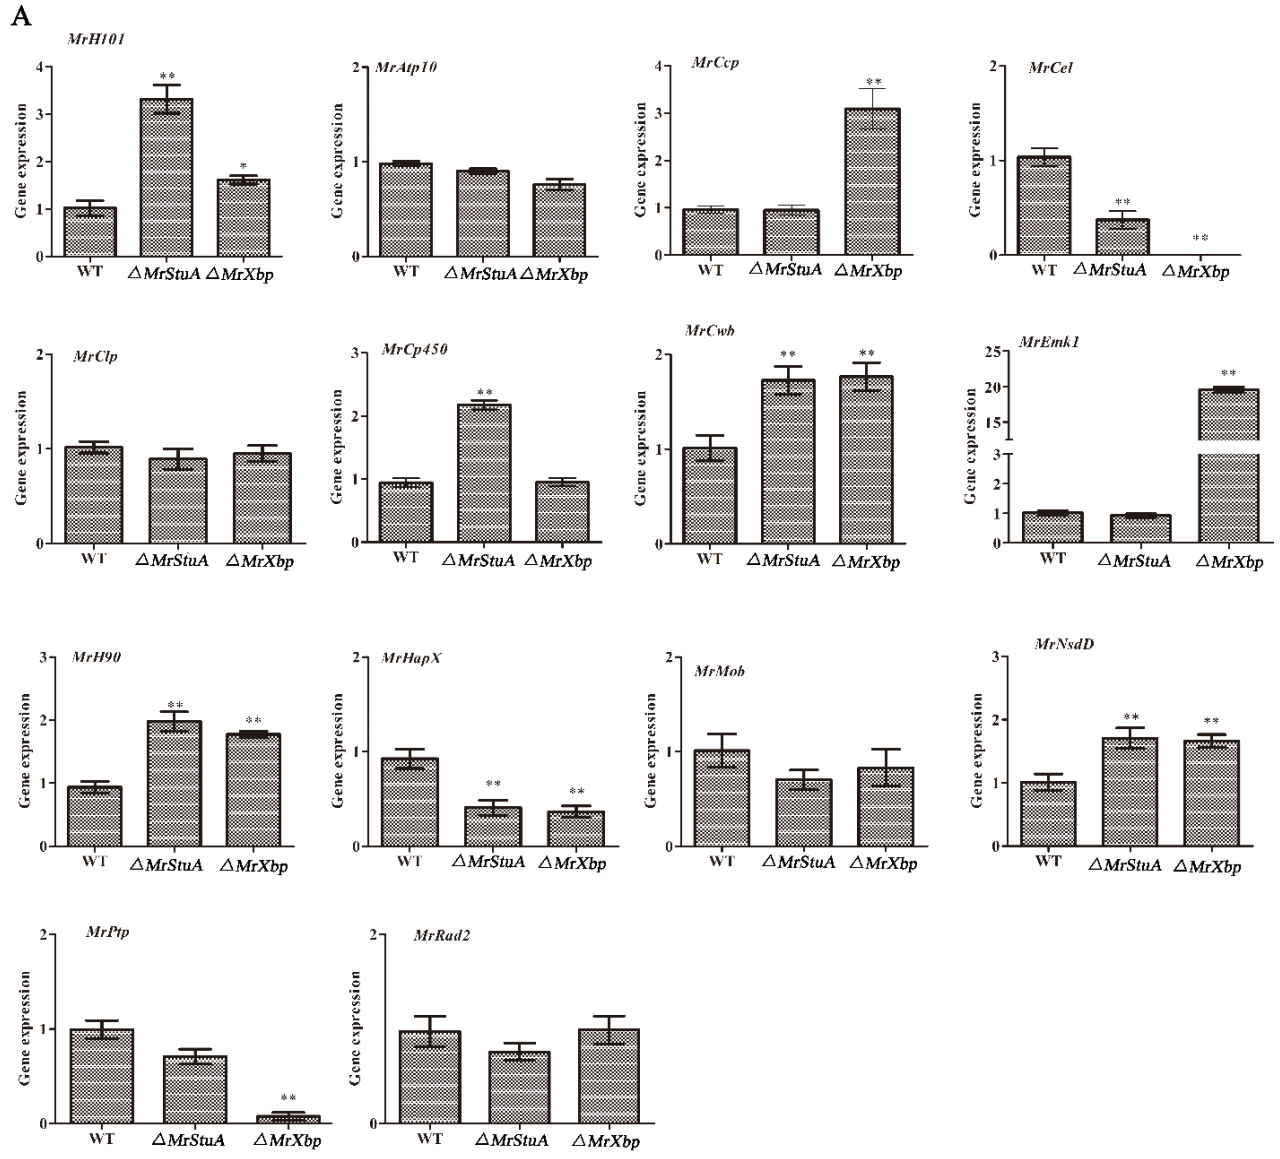



B

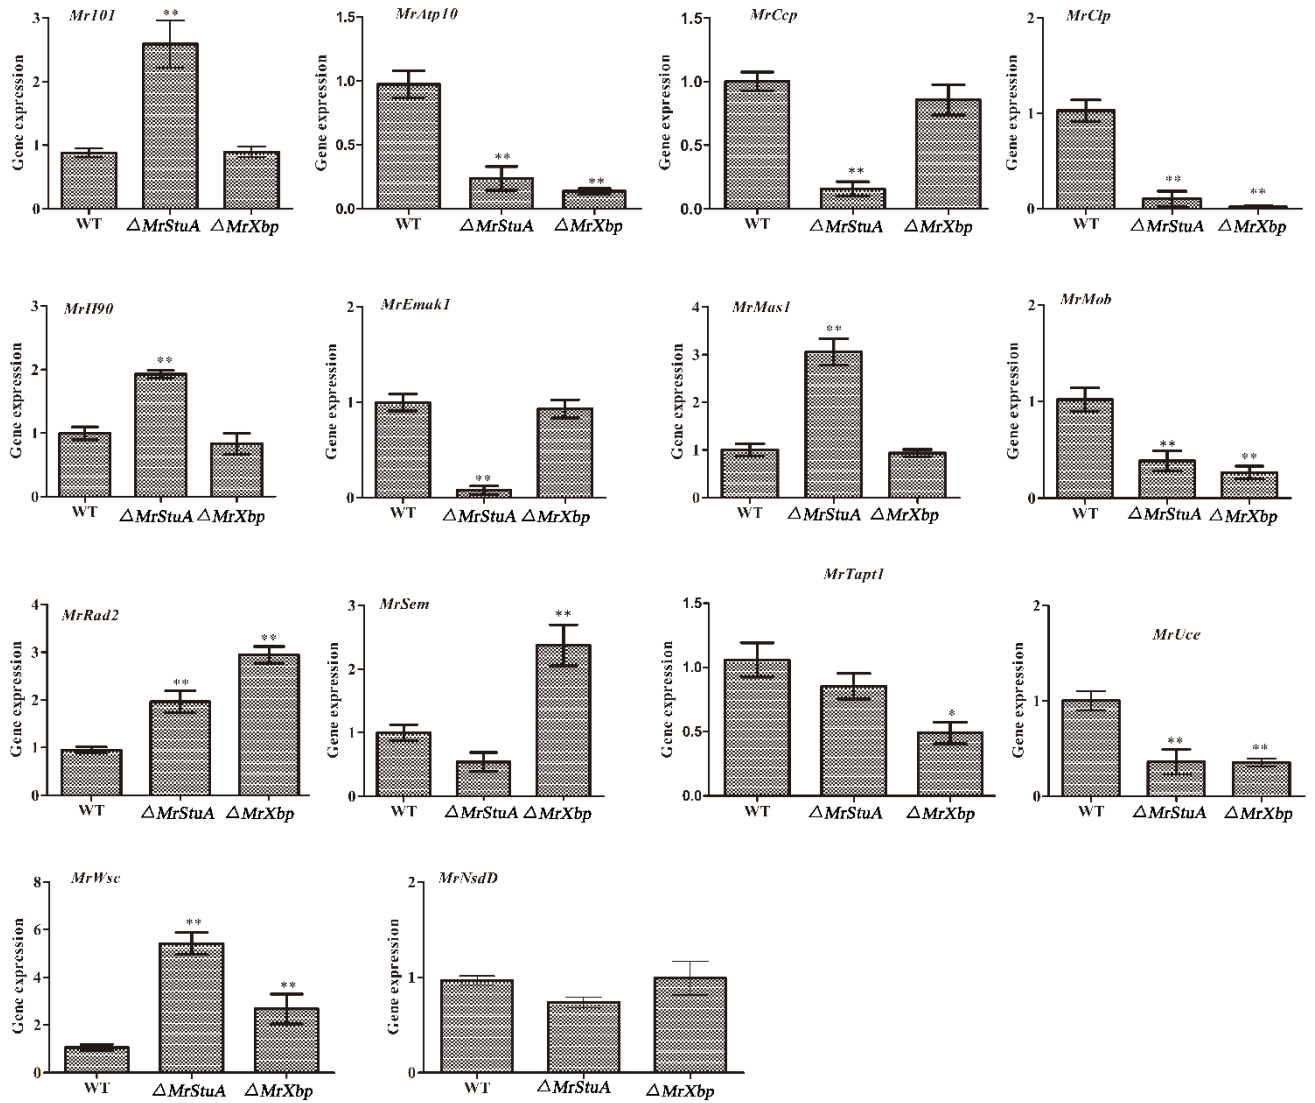

**Fig. S10** GO annotation of DGEs and all genes in the two morphogenesis in the (A)

$\Delta MrStuA$  and (B)  $\Delta MrXbp$  mutants

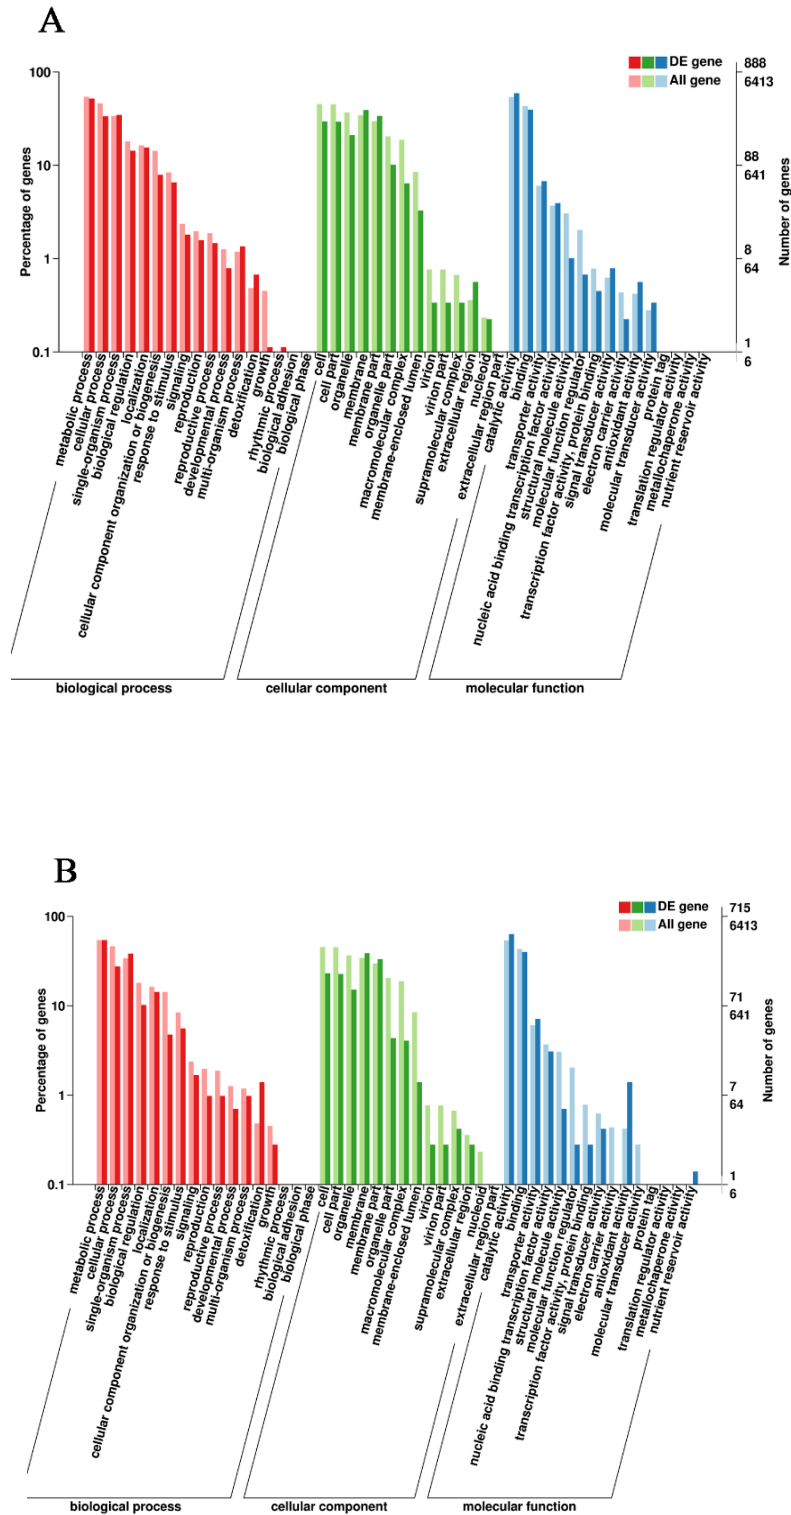

**Fig. S11** COG classifications of consensus sequence in the two morphogenesis in the

(A)  $\Delta MrStuA$  and (B)  $\Delta MrXbp$  mutants

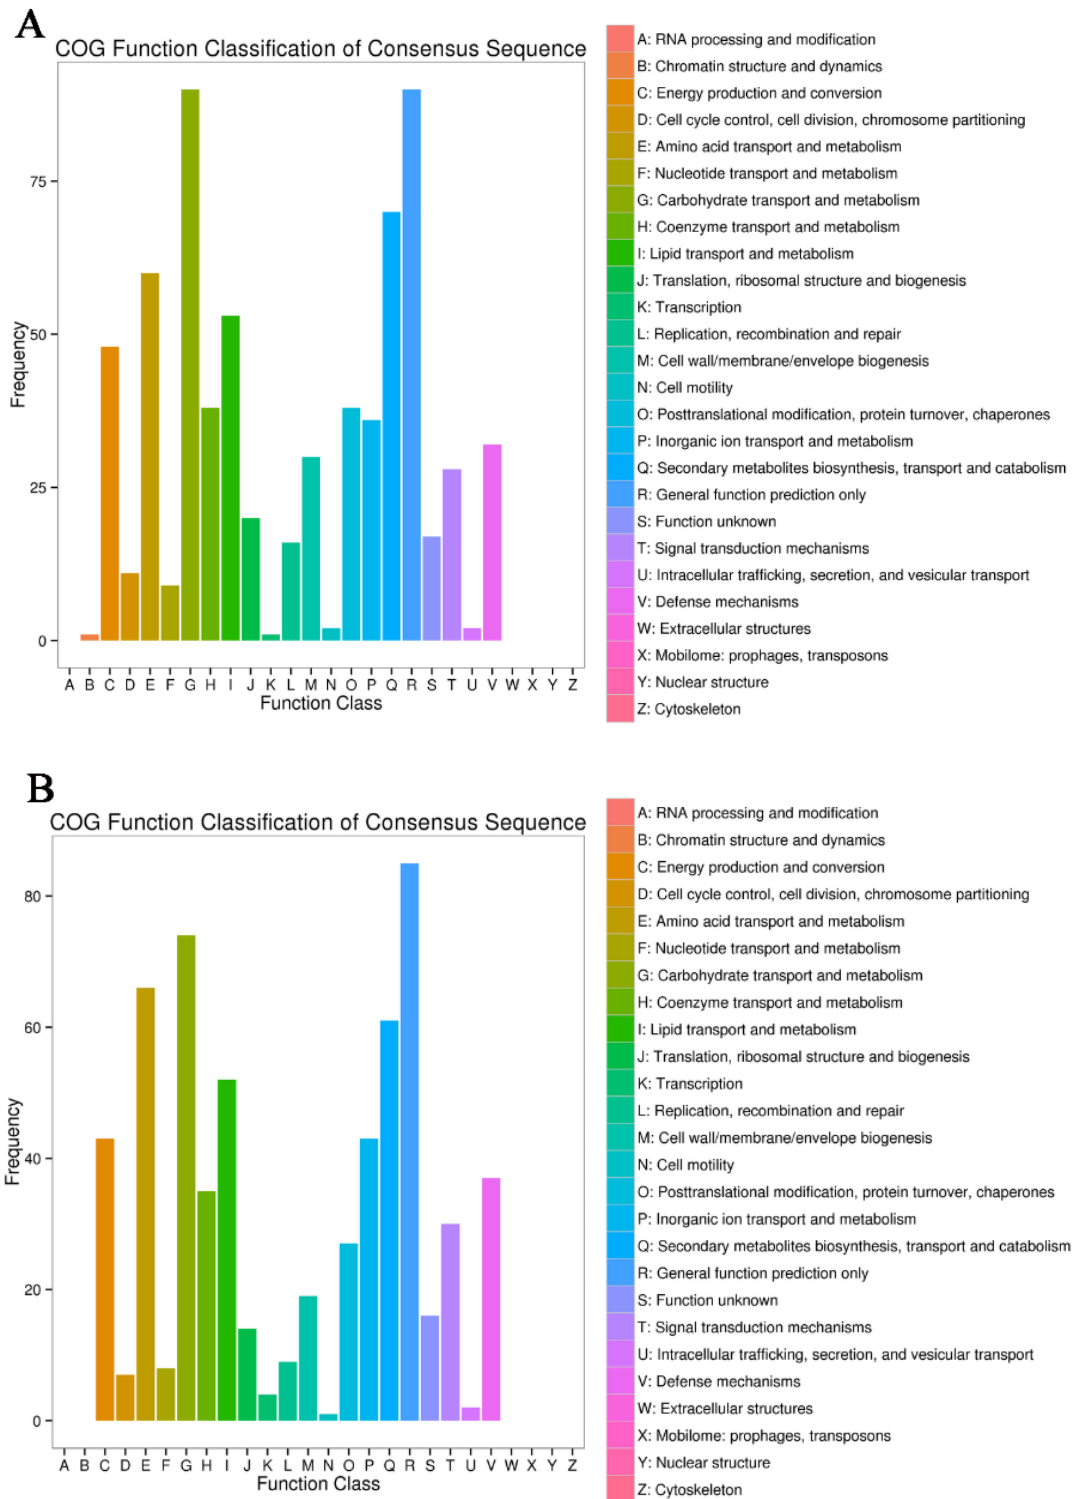

**Fig. S12** KEGG enrichment pathways of DGEs in the two morphogenesis in the (A)  $\Delta MrStuA$  and (B)  $\Delta MrXbp$  mutants

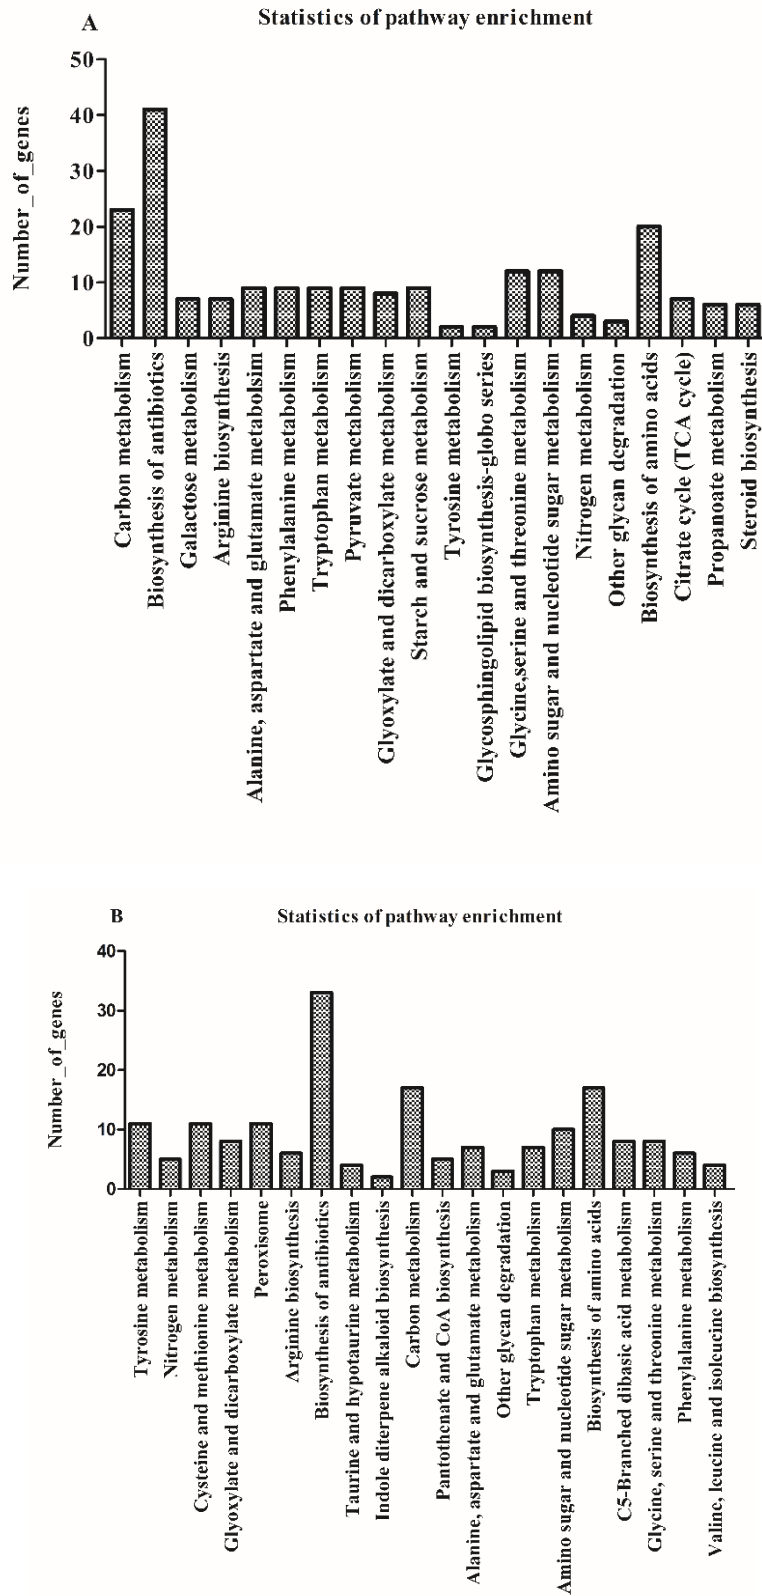

**Fig. S13** Venn diagram showing the number of shared differentially expressed genes in the three fungal transcription factors

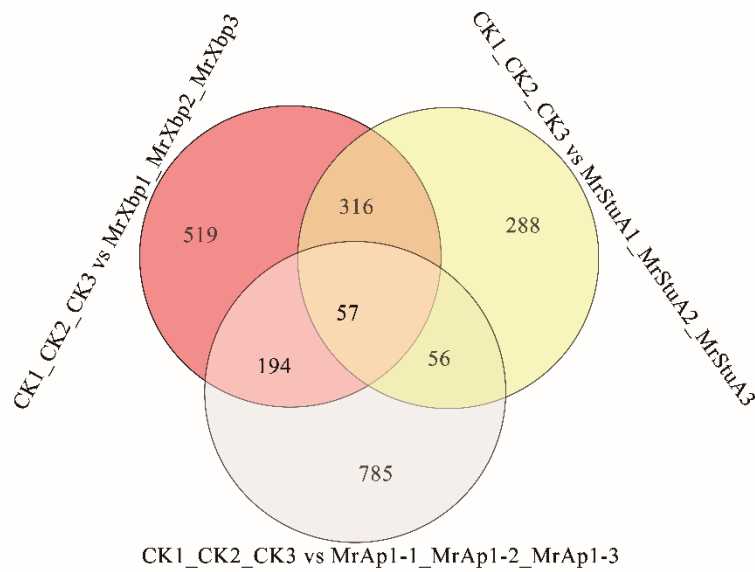

The distribution of shared upregulated and downregulated genes in wild-type (WT),  $\Delta MrXbp$ ,  $\Delta MrStuA$ , and  $\Delta MrAp1$  mutants during microsclerotium development. CK1, CK2, and CK3 were three replicates of the WT strain. *MrXbp 1*, *MrXbp2*, and *MrXbp3* were three replicates of the  $\Delta MrXbp$  mutants. *MrStuA*, *MrStuA2*, and *MrStuA3* were three replicates of the  $\Delta MrStuA$  mutants. *MrAp1-1*, *MrAp1-2*, and *MrAp1-3* were three replicates of the  $\Delta MrAp1$  mutants.
